# Supplementary material
Source: HighWire-hosted journal article supplement (http://www.jneurosci.org/highwire/filestream/601097/field_highwire_adjunct_files/0/Supplemental_Figures.pdf)
Supplement: Supplemental_Figures.pdf [file Supplemental_Figures.pdf]

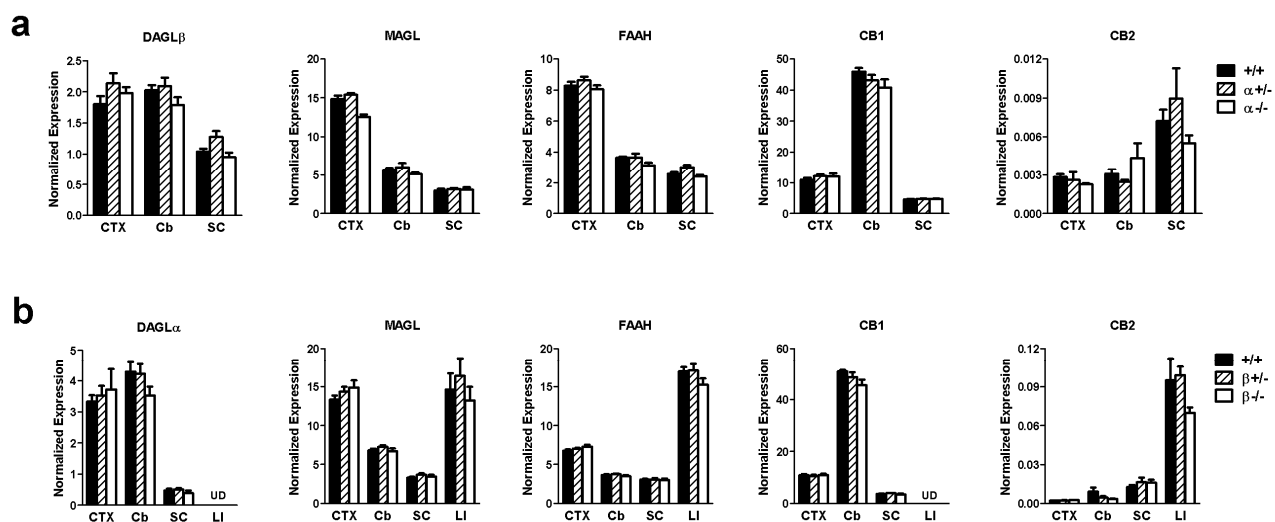

**Supplementary Fig 1. Loss of either DAGL $\alpha$  or DAGL $\beta$  has no impact on expression of other eCB pathway transcripts.** Taqman analysis for mRNA levels of DAGL $\alpha$ , DAGL $\beta$ , MAGL, FAAH, CB1, and CB2 in the cortex (CTX), cerebellum (Cb), spinal cord (SC), and liver (LI) from 3-5 wt (+/+), DAGL $\alpha^{+/-}$  ( $\alpha^{+/-}$ ), DAGL $\alpha^{-/-}$  ( $\alpha^{-/-}$ ), DAGL $\beta^{+/-}$  ( $\beta^{+/-}$ ), and DAGL $\beta^{-/-}$  ( $\beta^{-/-}$ ) mice. mRNA expression is normalised as the percentage of GAPDH levels.

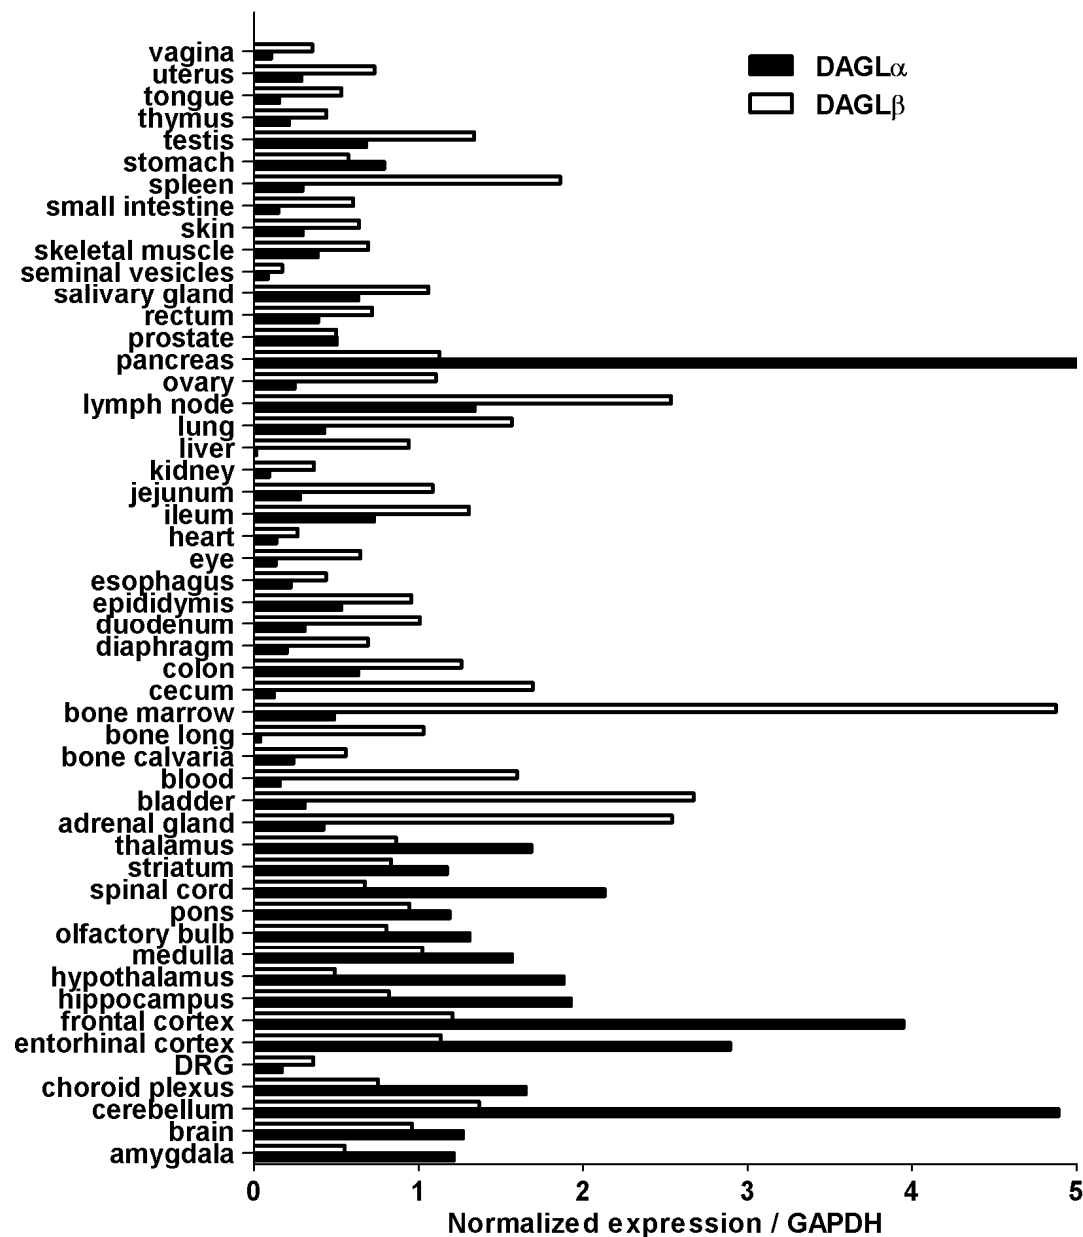

**Supplementary Fig 2. Tissue distribution of DAGL $\alpha/\beta$  transcripts.** TaqMan qRT-PCR was performed on RNA samples extracted from multiple mouse tissue samples to detect DAGL $\alpha/\beta$  mRNA. Data were fitted to a standard curve generated with varying amounts of cDNA. Expression levels of DAGL $\alpha/\beta$  were normalized to GAPDH.
